# Supplementary material
Source: publisher figshare collection journal article supplement (https://frontiersin.figshare.com/ndownloader/files/12500336)
Supplement: Supplementary file 1 [file 12500336]

**Supplementary Data S1**

*Spatial scale of cohesive dispersal and initial cohort’s size*

A newly recruited cohort contains roughly 100-1000 larvae (personal communication with MK, who took part in the field work and sampling for Ben-Tzvi et al. 2012). If we assume that the mortality coefficient is 0.2 (Cowen et al., 2000), given a PLD of 29 days, we get a newly-formed school of 50,000 - 500,000 individuals. Given a pairwise distance of ~0.1 m between larvae, these numbers of larvae will encompass a water volume of 50 - 500 m3, which would result in spatial scales of tens to hundreds of meters, depending on the cohort’s spatial shape.

Cowen, R. K., Lwiza, K. M. M., Sponaugle, S., Paris, C. B., and Olson, D. B. (2000). Connectivity of marine populations: open or closed? *Science (80-. ).* 287, 857–859. doi:10.1126/science.287.5454.857.
